# Supplementary material
Source: bioRxiv or medRxiv preprint supplement (https://www.medrxiv.org/highwire/filestream/83726/field_highwire_adjunct_files/0/2020.05.10.20097055-1.pdf)
Supplement: Supplementary file [file 2020.05.10.20097055-1.pdf]

# Traces of SARS-CoV-2 RNA in the Blood of COVID-19 Patients

Ahmed Moustafa<sup>1,\*</sup>, Ramy K. Aziz<sup>2,3,\*</sup>

## **Affiliations**

<sup>1</sup> Department of Biology, American University in Cairo, New Cairo, Egypt

<sup>2</sup> Department of Microbiology and Immunology, Faculty of Pharmacy, Cairo University, Cairo, Egypt

<sup>3</sup> Center for Genome and Microbiome Research, Cairo University, Cairo, Egypt

\* Corresponding author

## **Emails**

AM: [amoustafa@aucegypt.edu](mailto:amoustafa@aucegypt.edu)

RKA: [ramy.aziz@gmail.com](mailto:ramy.aziz@gmail.com)

## **Short title**

SARS-CoV-2 RNA in COVID-19 PBMC

## **Keywords**

SARS-CoV-2, Coronavirus, COVID-19, Blood, PBMC, RNA-Seq

## Supplementary Data

**Table S1. Summary of the samples included in the study, raw hits raw and estimated abundance metrics**

Nine RNA-Seq samples (Xiong et al. 2020) were analyzed, including 3 PBMC from healthy donors, 3 PBMC from patients, and 2 BALF from patients with an additional replicate each. The numbers are paired-end reads.

| Sample           | Description           | Total Reads | Viral Reads | Viral read abundance (ppm) | Actin transcripts | Spike-to-actin RNA ratio |
|------------------|-----------------------|-------------|-------------|----------------------------|-------------------|--------------------------|
| <b>CRR119890</b> | PBMC: Healthy Donor 1 | 78,077,390  |             |                            | 48.52195          | 0                        |
| <b>CRR125445</b> | PBMC: Healthy Donor 2 | 47,983,296  |             |                            | 27.3257           | 0                        |
| <b>CRR125446</b> | PBMC: Healthy Donor 3 | 47,804,999  |             |                            | 49.644            | 0                        |
| <b>CRR119891</b> | PBMC: Patient 1       | 76,420,796  | 2           | 0.03                       | 77.30287          | 0.000004696              |
| <b>CRR119892</b> | PBMC: Patient 2       | 76,333,057  |             | 0.00                       | 76.5192           | 0                        |
| <b>CRR119893</b> | PBMC: Patient 3       | 78,523,460  |             | 0.00                       | 77.5553           | 0                        |
| <b>CRR119894</b> | BALF: Patient 1 rep1  | 8,254,725   | 272,184     | 32,973.12                  | 24.0391           | 9.702268388              |
| <b>CRR119895</b> | BALF: Patient 1 rep2  | 3,671,406   | 107,423     | 29,259.36                  | 13.3584           | 8.889350521              |
| <b>CRR119896</b> | BALF: Patient 2 rep1  | 4,660,406   | 64,058      | 13,745.15                  | 20.762            | 2.450953665              |
| <b>CRR119897</b> | BALF: Patient 2 rep2  | 2,251,299   | 27,334      | 12,141.43                  | 13.0798           | 2.526200706              |

## References

- Xiong, Yong, Yuan Liu, Liu Cao, Dehe Wang, Ming Guo, Ao Jiang, Dong Guo, et al. 2020. "Transcriptomic Characteristics of Bronchoalveolar Lavage Fluid and Peripheral Blood Mononuclear Cells in COVID-19 Patients." *Emerging Microbes & Infections* 9 (1): 761–70.
